# Supplementary material for: High-resolution digital mapping of soil organic carbon in permafrost terrain using machine-learning: A case study in a sub-Arctic peatland environment
Source: Copernicus journal article supplement (doi:10.5194/bg-2017-323), 2017-08-04
Supplement: Supplementary file 1 [file bg-2017-323-supplement.pdf]

# High-resolution digital mapping of soil organic carbon in permafrost terrain using machine-learning: A case study in a sub-Arctic peatland environment

Matthias B. Siewert<sup>1,2</sup>

<sup>1</sup>Department of Physical Geography, Stockholm University, Stockholm, SE-106 91, Sweden

<sup>2</sup>New Affiliation: Department of Ecology and Environmental Science, Umeå University, Umeå, SE-901 87, Sweden

Correspondence to: Matthias B. Siewert (matthias.siewert@umu.se)

Supplementary material

Table A. 1: Description of the individual land cover classes adapted from Andersson (2016)

| Land cover class      | Description                                                                                                                                                                                                                                                                                                                                                                                |
|-----------------------|--------------------------------------------------------------------------------------------------------------------------------------------------------------------------------------------------------------------------------------------------------------------------------------------------------------------------------------------------------------------------------------------|
| Bare ground           | Exposed bedrock, blockfields, rock fragments covered ground or barren unvegetated soil with no or very little vegetation cover; vegetation includes mosses in patches of few centimeters in diameter and lichens.                                                                                                                                                                          |
| Alpine heath tundra   | Areas above the tree line >~500 m a.s.l., covered by low growing vegetation from few centimeters to few decimeter height, often alternating with exposed bare soil or rocks; low growing deciduous and evergreen shrubs, including <i>Betula nana</i> , <i>Empetrum sp.</i> , mosses and lichens. Can be associated with cryoturbation landforms such as solifluction lobes and mud boils. |
| Alpine willow         | Alpine areas above the Birch tree line covered by low growing willow ( <i>Salix sp.</i> ) shrubs mostly confined to wind protected depressions along river pathways with wet soil conditions and micro-climate.                                                                                                                                                                            |
| Birch forest          | Forest dominated by mountain birch ( <i>Betula pubescens ssp. czerepanovii</i> ); tree height is 2–15 m; trees can have single stems (monocormic) or grow with many stems divided near the ground (polycormic); birch forest is restricted to areas below ~600 m altitude.                                                                                                                 |
| Sparse birch forest   | Lower elevation areas with spread-out clusters of birch trees ( <i>Betula pubescens ssp. Czerepanovii</i> ) over boulder fields with disrupted soil cover.                                                                                                                                                                                                                                 |
| Dwarf shrub           | Areas covered by small shrubs up to ~50 cm high. Mainly in subalpine terrain at the transition from birch forest to alpine heath tundra, but also adjacent to lowland wetland areas over boulder terrain.                                                                                                                                                                                  |
| Forested wetland      | Forested areas with trees higher than 2 m ( <i>Betula pubescens ssp. Czerepanovii</i> and <i>Salix sp.</i> ) and seasonally waterlogged ground conditions. The ground has significant peat accumulation. On alluvial fans fern can cover the ground.                                                                                                                                       |
| Lowland shrub wetland | Fen areas with substantial growth of dwarf shrubs, mostly low growing willow ( <i>Salix sp.</i> ); ground cover is tall graminoids and <i>Sphagnum sp.</i> Found close to streams and rivers.                                                                                                                                                                                              |
| Sphagnum wetland      | Waterlogged fen areas with continuous <i>Sphagnum sp.</i> ground cover and some graminoids. No distinction between ombrotrophic and minerotrophic areas was made.                                                                                                                                                                                                                          |
| Sedge wetland         | Waterlogged wetland areas with standing water and sedges ( <i>Eriophorum angustifolium</i> and <i>Carex spp.</i> ). Often transitions into lakes and ponds. Mostly minerotrophic areas surrounding the peat plateaus or small wetlands surrounded by birch forest.                                                                                                                         |
| Peat Bog              | Dry elevated ombrotrophic wetland areas, mostly in form of palsa plateaus elevated by the occurrence of permafrost; vegetation includes growing evergreen and deciduous shrubs such as <i>Empetrum hermaphroditum</i> and <i>Betula nana</i> , <i>Rubus chamaemorus</i> , mosses and lichens.                                                                                              |

|                     |                                                                                                                                   |
|---------------------|-----------------------------------------------------------------------------------------------------------------------------------|
| Water               | Water bodies with a minimum area of 130 m <sup>2</sup> including rivers, ponds and lakes. Including Tometräsk lake; masked layer. |
| Artificial surfaces | Street, railway and buildings including a buffer margin; masked layer.                                                            |

Table A. 2: Confusion matrix of the land cover classification based on 108 ground control points.

|                       | Alpine    |              | Sparse      |               |              |              | Lowland          |               |               | Samples          |          |          |
|-----------------------|-----------|--------------|-------------|---------------|--------------|--------------|------------------|---------------|---------------|------------------|----------|----------|
|                       | Bare rock | heath tundra | Dwarf shrub | Alpine willow | Birch Forest | Birch Forest | Forested wetland | Sedge wetland | shrub wetland | Sphagnum wetland | Peat bog | (N: 108) |
| Bare rock             | 5         | 3            | 1           | 0             | 0            | 0            | 0                | 0             | 0             | 0                | 0        | 9        |
| Alpine heath tundra   | 0         | 6            | 0           | 0             | 0            | 0            | 0                | 0             | 0             | 0                | 0        | 6        |
| Dwarf shrub           | 1         | 1            | 4           | 1             | 0            | 0            | 0                | 0             | 0             | 0                | 0        | 7        |
| Alpine willow         | 0         | 1            | 1           | 3             | 1            | 1            | 0                | 0             | 0             | 0                | 0        | 7        |
| Sparse Birch Forest   | 0         | 0            | 1           | 0             | 11           | 0            | 0                | 0             | 0             | 0                | 0        | 12       |
| Birch Forest          | 0         | 0            | 1           | 1             | 4            | 21           | 0                | 0             | 0             | 0                | 0        | 27       |
| Forested wetland      | 0         | 0            | 0           | 0             | 0            | 0            | 6                | 0             | 0             | 0                | 0        | 6        |
| Sedge wetland         | 0         | 0            | 1           | 0             | 0            | 0            | 0                | 7             | 0             | 1                | 3        | 12       |
| Lowland shrub wetland | 0         | 0            | 0           | 0             | 0            | 0            | 1                | 0             | 4             | 0                | 0        | 5        |
| Sphagnum wetland      | 0         | 0            | 0           | 0             | 0            | 0            | 0                | 0             | 0             | 2                | 2        | 4        |
| Peat bog              | 1         | 0            | 0           | 0             | 0            | 0            | 0                | 0             | 0             | 1                | 11       | 13       |
| Overall Accuracy      | 74%       |              |             |               |              |              |                  |               |               |                  |          |          |
| Kappa                 | 0.71      |              |             |               |              |              |                  |               |               |                  |          |          |

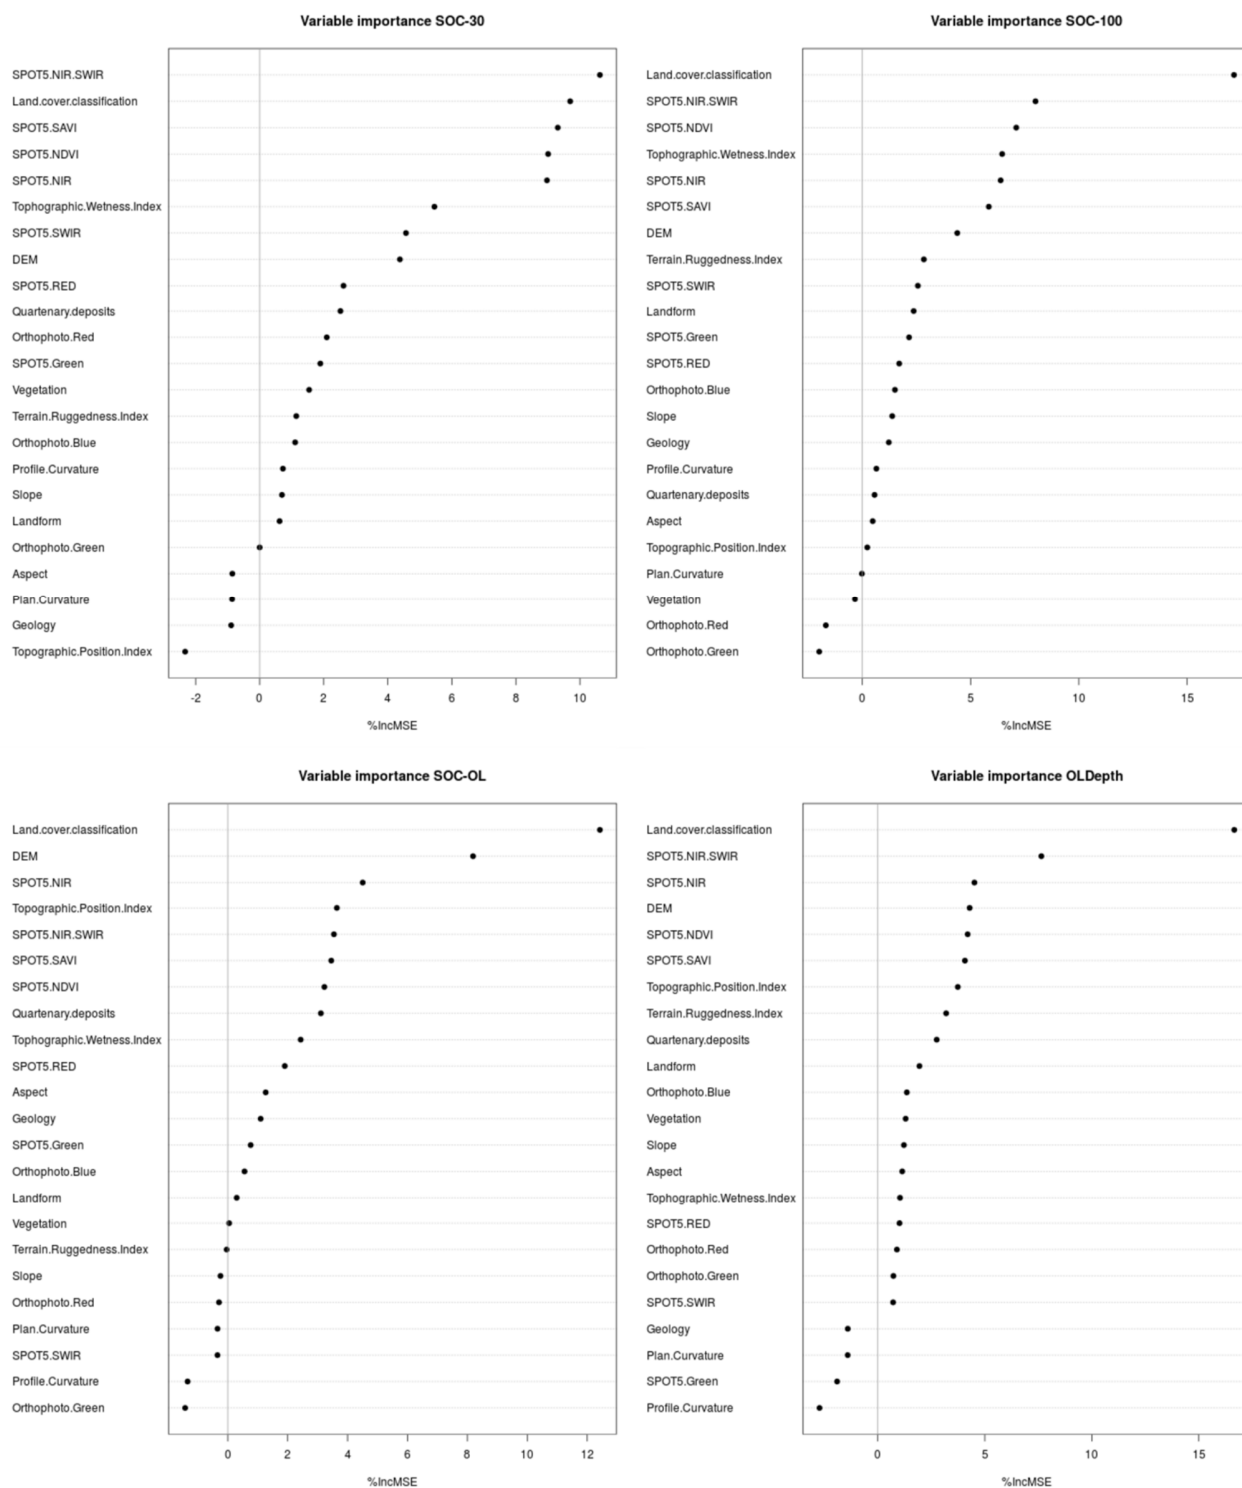

Fig.A. 1: Variable importance plots for individual random forests prediction models of SOC-30, SOC 0-100, SOC- OL and OL-Depth measured in mean decrease in accuracy (% IncMSE).
